# Untangling featural and conceptual object representations

Tijl Grootswagers<sup>1,2,^</sup>, Amanda K. Robinson<sup>1,2</sup>, Sophia M. Shatek<sup>1</sup>, Thomas A. Carlson<sup>1</sup>

<sup>1</sup> School of Psychology, University of Sydney, Sydney, NSW, Australia

<sup>2</sup> Perception in Action Research Centre, Macquarie University, Sydney, NSW, Australia

<sup>^</sup> Corresponding author: [tijl.grootswagers@sydney.edu.au](mailto:tijl.grootswagers@sydney.edu.au)

## Abstract

How are visual inputs transformed into conceptual representations by the human visual system? The contents of human perception, such as objects presented on a visual display, can reliably be decoded from voxel activation patterns in fMRI, and in evoked sensor activations in MEG and EEG. A prevailing question is the extent to which brain activation associated with object categories is due to statistical regularities of visual features within object categories. Here, we assessed the contribution of mid-level features to conceptual category decoding using EEG and a novel fast periodic decoding paradigm. Our study used a stimulus set consisting of intact objects from the animate (e.g., fish) and inanimate categories (e.g., chair) and scrambled versions of the same objects that were unrecognizable and preserved their visual features (Long, Yu, & Konkle, 2018). By presenting the images at different periodic rates, we biased processing to different levels of the visual hierarchy. We found that scrambled objects and their intact counterparts elicited similar patterns of activation, which could be used to decode the conceptual category (animate or inanimate), even for the unrecognizable scrambled objects. Animacy decoding for the scrambled objects, however, was only possible at the slowest periodic presentation rate. Animacy decoding for intact objects was faster, more robust, and could be achieved at faster presentation rates. Our results confirm that the mid-level visual features preserved in the scrambled objects contribute to animacy decoding, but also demonstrate that the dynamics vary markedly for intact versus scrambled objects. Our findings suggest a complex interplay between visual feature coding and categorical representations that is mediated by the visual system's capacity to use image features to resolve a recognisable object.

## 25 Introduction

26 How does the brain transform perceptual information into meaningful concepts and categories? One key  
27 organisational principle of object representations in the human ventral temporal cortex is animacy (Caramazza &  
28 Mahon, 2003; Caramazza & Shelton, 1998; Kiani, Esteky, Mirpour, & Tanaka, 2007; Kriegeskorte et al., 2008;  
29 Mahon & Caramazza, 2011; Spelke, Phillips, & Woodward, 1995). Operationalised as objects that can move on  
30 their own volition, animate objects evoke different activation patterns than inanimate objects in human brain  
31 activity patterns in fMRI (Cichy, Pantazis, & Oliva, 2014; Connolly et al., 2012; Downing, Jiang, Shuman, &  
32 Kanwisher, 2001; Grootswagers, Cichy, & Carlson, 2018; Konkle & Caramazza, 2013; Kriegeskorte et al., 2008)  
33 and in MEG/EEG (Carlson, Tovar, Alink, & Kriegeskorte, 2013; Contini, Wardle, & Carlson, 2017;  
34 Grootswagers, Ritchie, Wardle, Heathcote, & Carlson, 2017; Grootswagers, Robinson, & Carlson, 2019;  
35 Kaneshiro, Guimaraes, Kim, Norcia, & Suppes, 2015; Ritchie, Tovar, & Carlson, 2015). A current theoretical  
36 debate concerns the degree to which categorical object representations in ventral temporal cortex are due to  
37 systematic featural differences within categories (Long et al., 2018; op de Beeck, Haushofer, & Kanwisher, 2008;  
38 Proklova, Kaiser, & Peelen, 2016).

39 Recent work has focused on understanding the contribution of visual features to the brain's representation of  
40 categories, such as animacy. This work has shown that a substantial proportion of animacy (de)coding in ventral  
41 temporal cortex can be explained by low and mid-level visual features (e.g., texture and curvature) that are  
42 inherently associated with animate versus inanimate objects (Andrews, Watson, Rice, & Hartley, 2015; Bracci &  
43 Op de Beeck, 2016; Bracci, Ritchie, & de Beeck, 2017; Bracci, Ritchie, Kalfas, & Op de Beeck, 2019; Coggan, Liu,  
44 Baker, & Andrews, 2016; Kaiser, Azzalini, & Peelen, 2016; Long et al., 2018; Proklova et al., 2016; Rice, Watson,  
45 Hartley, & Andrews, 2014; Ritchie, Bracci, & op de Beeck, in press; Watson, Young, & Andrews, 2016). Long et  
46 al. (2018) recently investigated how mid-level features contribute to categorical representations using images of  
47 intact objects and scrambled "texform" versions of the same objects. Crucially, the texform versions of the objects  
48 were unrecognisable (at the individual image identity level) but preserved mid-level features such as texture. Using  
49 fMRI, they found the categories of animacy and size were similarly coded in the brain for intact and texform  
50 versions of objects, thus demonstrating that such patterns can arise without the explicit recognition of an object  
51 (Long et al., 2018). In MEG and EEG, one study showed that animate and inanimate objects cannot be

52 differentiated when they are closely matched for shape (Proklova, Kaiser, & Peelen, 2019). Other studies, however,  
53 have found that object animacy decoding generalises to unseen exemplars with different shapes (cf. Contini et al.,  
54 2017), suggesting animacy decoding, in part, might be based on general conceptual representations. Taken  
55 together, these results suggest that either there is some abstract conceptual representation of animacy, or that  
56 objects within the animate and inanimate categories share sufficient visual regularities to drive the categorical  
57 organisation of object representations in the brain.

58 In the current study, we tested the contribution of visual features to the dynamics of emerging conceptual  
59 representations. We used a previously published stimulus set (Figure 1) that was designed to test the contribution  
60 of mid-level features to conceptual categories (animacy and size) in the visual system (Long et al., 2018), which  
61 consisted of luminance-matched real objects, and scrambled, “texform” versions of the same objects that retain  
62 mid-level texture and form information (Long, Störmer, & Alvarez, 2017; Long et al., 2018). We used EEG and a  
63 rapid-MVPA paradigm (Grootswagers et al., 2019) to study the emergence of conceptual information. Based on  
64 previous fMRI work (Long et al., 2018), we predicted that texforms would evoke animacy-like patterns in the EEG  
65 signal similar to intact objects. In addition, we hypothesized that animacy-like patterns evoked by texforms may  
66 need more time to develop. To test this, we presented the stimuli at varying rapid presentation rates, as faster rates  
67 have been shown to limit the depth of stimulus processing (Collins, Robinson, & Behrmann, 2018; Grootswagers  
68 et al., 2019; McKeef, Remus, & Tong, 2007; Robinson, Grootswagers, & Carlson, 2019). We found that EEG  
69 activation patterns of texform versions of the objects were decodable, but that conceptual categorical decoding of  
70 intact objects was more robust, and could be achieved at faster presentation rates, which suggests that the visual  
71 system needs less time to process the intact objects. Together, our results provide evidence that visual features  
72 contribute to the representation of conceptual object categories, but also show that higher level abstractions cannot  
73 be fully explained by statistical regularities.

### A Textform objects

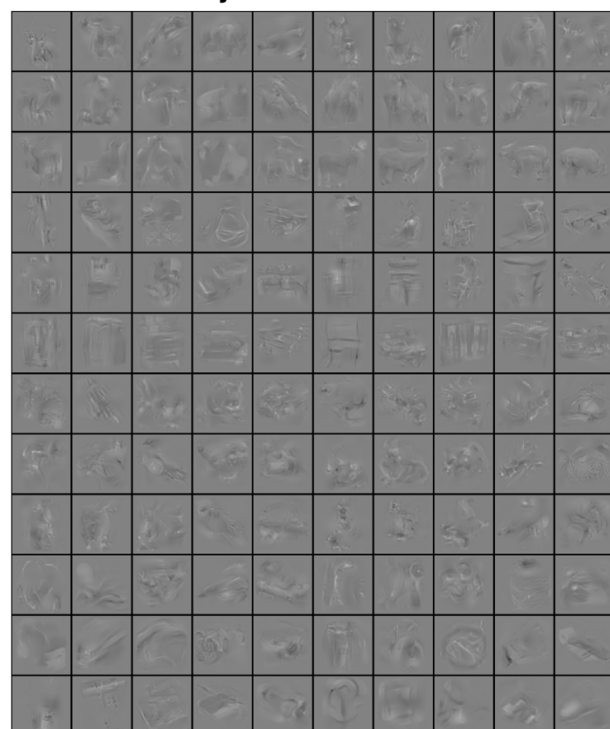

### B Intact objects

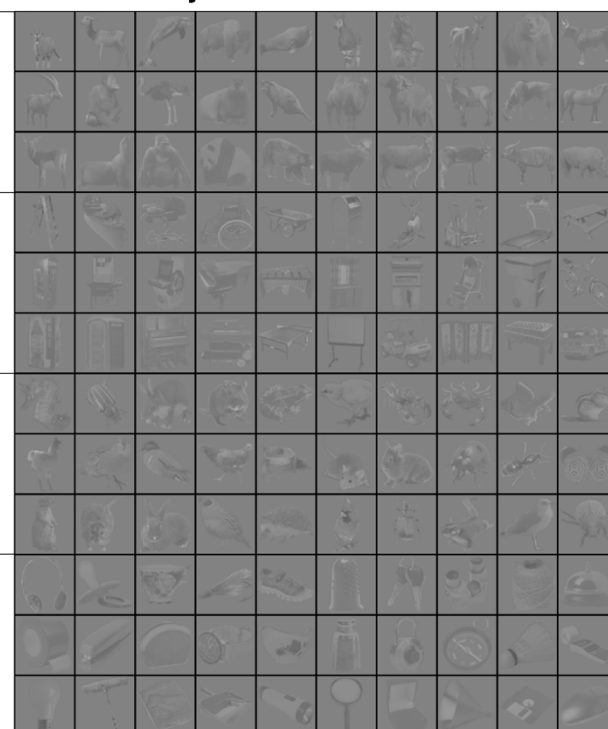

### C Example 5Hz sequence (texforms)

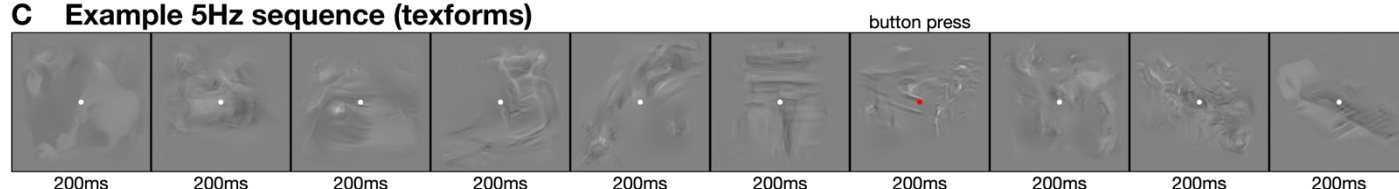

### D Example 5Hz sequence (intact objects)

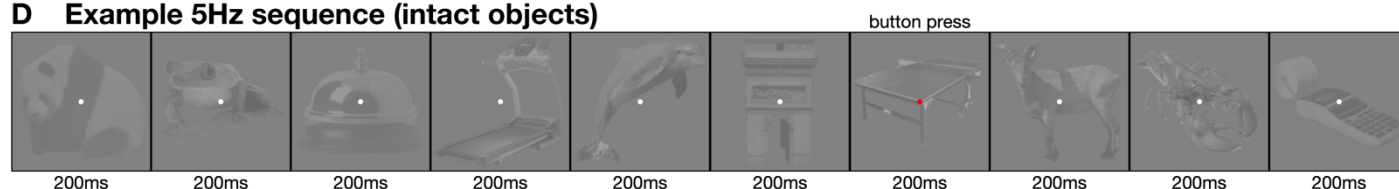

74 **Figure 1. Stimuli and design.** Stimuli were 120 objects categorizable as animate or inanimate, and as big or small.  
75 A. The first half of the experiment used texform versions of objects (presented first so that participants were not  
76 aware of their intact counterparts). B. In the second half of the experiment, the original intact versions were used.  
77 All images were obtained from <https://osf.io/69pbd/> (Long et al., 2018). Stimuli were presented at four  
78 presentation frequencies. C. Example texform sequence at 5Hz, where stimuli were presented for 200ms each. D.  
79 Example intact object sequence at 5Hz. The sequence presentation orders for intact objects and texforms were  
80 matched. Participants performed an orthogonal task where they responded with a button press to the fixation dot  
81 turning red.  
82

83

## 84 Methods

85 Stimuli, data, and analysis code are available online through <https://osf.io/sz9ve>.

## 86 Participants

87 Participants were 20 volunteers (11 females, 9 males; mean age 24.6, age range: 17-59) recruited from the University  
88 of Sydney in return for payment or course credit. All participants reported normal or corrected-to-normal vision.  
89 Two participants were left-handed. The study was approved by the University of Sydney ethics committee and  
90 informed consent in writing was obtained from all participants.

## 91 Stimuli and design

92 Stimuli were obtained from <https://osf.io/69pbd> (Long et al., 2018). For a full description of the stimulus  
93 generation procedures, see Long et al., 2018. The stimuli were 120 visual objects that were grouped in four  
94 categories: big animals, small animals, big objects, and small objects. This allowed for orthogonal animacy and size  
95 categorisation of the stimuli. All stimuli were matched for average luminance. The stimuli underwent a scrambling  
96 procedure (Long et al., 2018) to generate texform versions of the same objects. All 240 stimuli, 120 intact objects,  
97 and 120 texform versions were used in this experiment (Figure 1).

98 Following the procedure of Long et al., we presented participants with texform versions of the stimuli in the first  
99 half of the experiment, and with intact objects in the second half of the experiment. Participants were all naïve to  
00 the experiment aims and were not informed about the relationship between the texforms and intact images. We  
01 used a rapid serial visual processing paradigm to present the stimuli in fast succession (Grootswagers et al., 2019).  
02 Stimuli were presented in random order in streams at four presentation frequencies: 60Hz, 30Hz, 20Hz, and 5Hz,  
03 always using a 100% duty cycle, following previous work that investigated category decoding at fast presentation  
04 rates (Grootswagers et al., 2019; Mohsenzadeh, Qin, Cichy, & Pantazis, 2018). All stimuli within a category  
05 (texforms/objects) were presented in each stream (i.e., every stream contained 120 images). Stimuli were presented  
06 at 6.8 x 6.8 degrees of visual angle on a grey background and were overlaid with a white fixation dot of 0.2 degrees  
07 diameter (Figure X). During the experiment, participants responded with a button press when the dot changed

08 colour, which happened between 1 and 4 times during each stream, at random positions in the stream. Each object  
09 was presented 30 times in each condition (intact and texform), and at each presentation frequency. The experiment  
10 lasted about 40 minutes.

## 11 EEG recordings and preprocessing

12 Continuous EEG data were recorded from 64 electrodes arranged according to the international standard 10–10  
13 electrode placement system (Oostenveld & Praamstra, 2001) using a BrainVision ActiChamp system, digitized at  
14 a 1000-Hz sample rate and referenced online to Cz. Preprocessing was performed offline using EEGLab (Delorme  
15 & Makeig, 2004). Data were filtered using a Hamming windowed FIR filter with 0.1Hz highpass and 100Hz  
16 lowpass filters and were downsampled to 250Hz. No further preprocessing steps were applied. All analyses were  
17 performed on the channel voltages at each time point. Epochs were created for each stimulus presentation ranging  
18 from [-100 to 1000 ms] relative to stimulus onset.

## 19 Decoding analysis

20 We applied an MVPA decoding pipeline (Grootswagers, Wardle, & Carlson, 2017) applied to the EEG channel  
21 voltages. The decoding analyses were implemented in CoSMoMVPA (Oosterhof, Connolly, & Haxby, 2016).  
22 Regularised linear discriminant analysis (LDA) classifiers were used in combination with a sequence cross-  
23 validation approach to decode pairwise image identities firstly between all pairs of texform images, and secondly  
24 between all pairs of intact object images. For animacy decoding, an exemplar-by-sequence cross-validation  
25 approach was used (Carlson et al., 2013; Grootswagers et al., 2019). That is, a pair of animate and inanimate images  
26 from one sequence was used as test data, and classifiers were trained on the remaining images from the remaining  
27 sequences. This was repeated for all animate-inanimate pairs and all sequences, averaging the resulting cross-  
28 validated prediction accuracies. Real-world size decoding used the same pipeline, with an exemplar-by-sequence  
29 cross-validation procedure. To test for the similarity between texform and object patterns, we performed the same  
30 analyses and cross-validation designs described above, but we trained the classifiers on intact object sequences and  
31 tested on the texform sequences, and vice versa. All analyses were repeated for each time point in the epochs,

32 resulting in a decoding accuracy over time for every presentation frequency, within subject. The subject-averaged  
33 results for each frequency were analysed at the group level.

#### 34 Statistical inference

35 For each decoding analysis, we used Bayesian statistics to determine the evidence for above chance decoding or  
36 non-zero differences between texform and intact object decoding accuracies (Dienes, 2011, 2016; Jeffreys, 1961;  
37 Rouder, Speckman, Sun, Morey, & Iverson, 2009; Wagenmakers, 2007). For the alternative hypothesis of above-  
38 chance (50%) decoding or a non-zero difference, a JZS prior (Rouder et al., 2009) was set with a scale factor of  
39 0.707 (Jeffreys, 1961; Rouder et al., 2009; Wetzels & Wagenmakers, 2012; Zellner & Siow, 1980). We then  
40 calculated the Bayes factor (BF) which is the probability of the data under the alternative hypothesis relative to the  
41 null hypothesis. We thresholded  $BF > 10$  as evidence for the alternative hypothesis, and  $BF < 1/3$  as evidence in  
42 favour of the null hypothesis (Jeffreys, 1961; Wetzels et al., 2011). In addition to the Bayes factors, we computed  
43 p-values for decoding against chance, and the differences between texform and intact object decoding accuracies.  
44 We used a sign-swap permutation test (1000 iterations), and computed threshold-free cluster enhancement (TFCE;  
45 Smith & Nichols, 2009) values at each time point. To correct for multiple comparisons, the maximum TFCE  
46 statistic across time for each permutation were selected to form a corrected null-distribution (Maris & Oostenveld,  
47 2007). We then calculated p-values by comparing the observed TFCE values to the corrected permutation  
48 distribution.

#### 49 Exploratory channel-searchlight analysis

50 To obtain insights into the source of the difference between texform and intact object decoding, we performed a  
51 channel by timepoint searchlight. For all contrasts, we performed multiclass decoding instead of all pairwise  
52 comparisons to reduce computation time. A leave-one-sequence-out cross-validation approach was performed on  
53 local clusters of channels. For each channel, a local cluster was constructed by taking the closest four neighbouring  
54 channels, and the decoding analyses were performed on the signal of just these channels. The decoding accuracies  
55 were stored at the centre channel of the cluster. This resulted in a time by channel map of decoding accuracy for

56 each of the contrasts, and for each subject, at each frequency. Here, we reported the results for the decoding  
57 differences at 5Hz and have added the other frequencies to the project's online repository.

## 58 Results

59 Participants (N=20) viewed streams of texform stimuli and intact objects (Figure 1). The stimuli were presented  
60 in random order at four presentation frequencies (60Hz, 30Hz, 20Hz, 5Hz) to target different levels of visual  
61 processing (Grootswagers et al., 2019; Robinson et al., 2019). The stimuli were developed by Long et al., (2017),  
62 and obtained from <https://osf.io/69pbd/> (Long et al., 2017, 2018). Continuous EEG was recorded during the  
63 streams and cut into overlapping epochs based on the onset of each stimulus within the streams. The epoched  
64 data were subjected to a multivariate decoding analysis, similar to previous work that decoded individual images  
65 in fast presentation streams (Grootswagers et al., 2019; Robinson et al., 2019).

66 To investigate how image representations differed between the texform and intact versions, we obtained cross-  
67 validated classifier performance between all pairwise texform images (Figure 2A), and all pairwise intact object  
68 images (Figure 2B). The differences between texform and intact object decoding accuracies (Figure 2C) showed  
69 evidence for no difference in the initial response (up to around 150ms), but higher accuracies for intact objects  
70 after that. These differences were localised in occipito-temporal areas (Figure 2D). Both texforms and intact  
71 objects were decodable from around 90 ms after stimulus onset at all presentation frequencies, characteristic of  
72 early stages of visual processing (Carlson et al., 2013; Cichy et al., 2014; Contini et al., 2017). Faster presentation  
73 frequencies resulted in lower peak decoding and shorter decoding durations, consistent with previous results  
74 showing that fast rates restrict visual processing (Robinson et al., 2019). In general, the image-level decoding results  
75 were similar between texforms and intact objects, apart from the intact objects at 5Hz, where a larger second peak  
76 was observed that was not apparent for the texforms. To further investigate the similarity between the underlying  
77 patterns, we performed cross-decoding where we trained on intact object patterns and tested on texform versions  
78 (Figure 2E), and vice versa (Figure 2F). The results of these analyses showed that the evoked patterns are  
79 sufficiently similar to allow for above-chance cross-decoding at all presentation frequencies.



### A texforms: image decoding

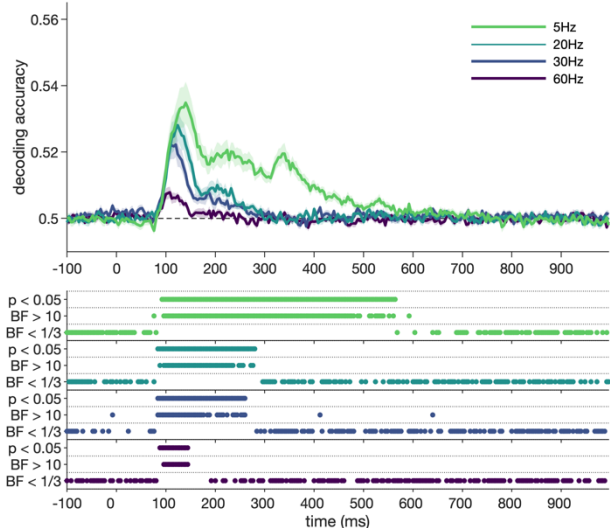

### B intact objects: image decoding

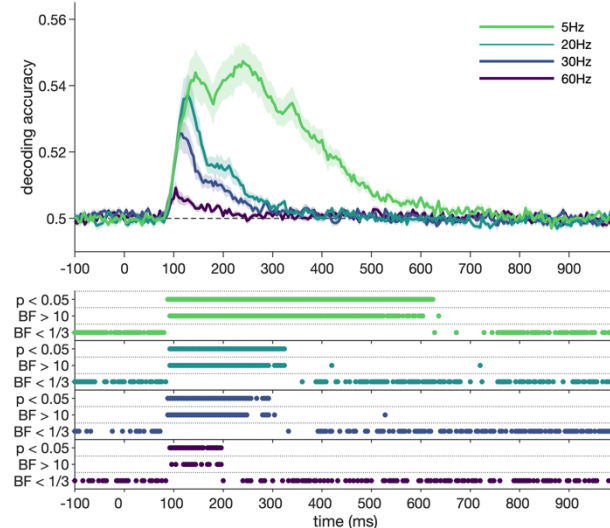

### C decoding difference (intact-texform)

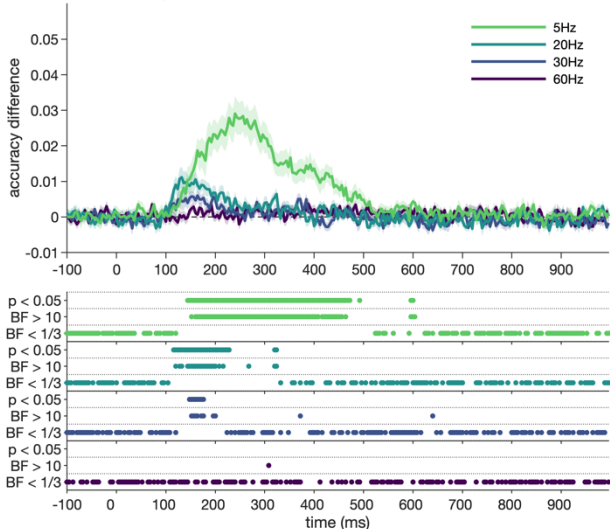

### D channel decoding differences at 5Hz

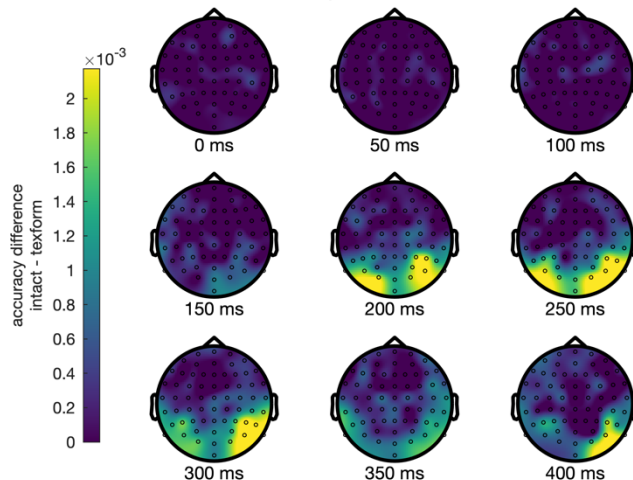

### E cross-decoding (test on texforms)

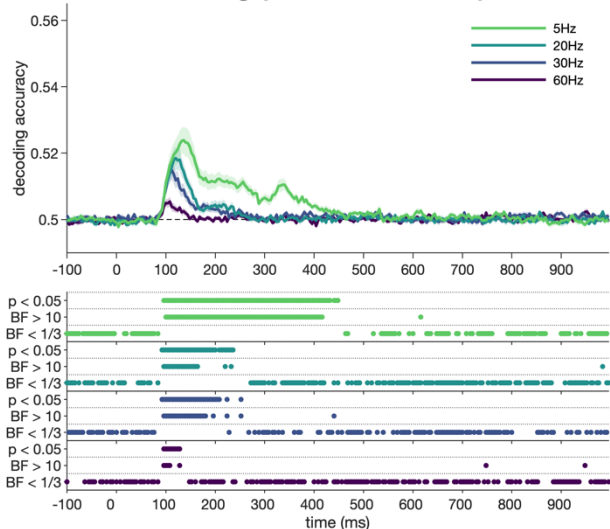

### F cross-decoding (test on intact objects)

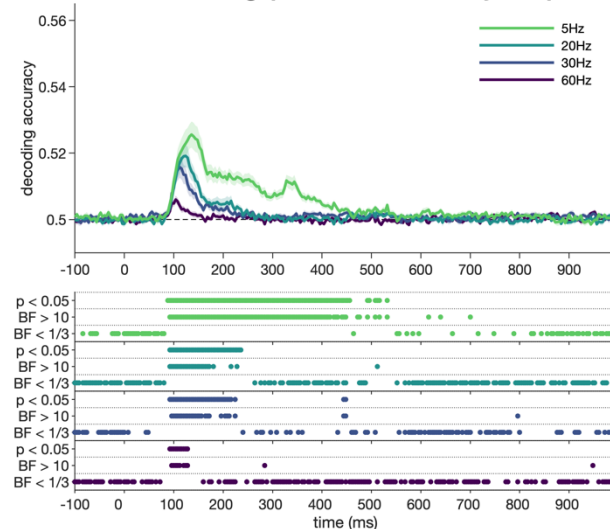

80

81

82

83

84

85

86

87

**Figure 2. Decoding texforms and intact objects.** **A.** Decoding between all texform image pairs. **B.** Decoding between all intact object image pairs. **C.** Difference between intact objects and texforms at each frequency. **D.** Channel searchlight maps at nine time points for the decoding differences at 5Hz. **E.** Decoding texforms, training the classifier on intact objects. **F.** Decoding intact objects, training on texforms. Different lines in each plot show decoding accuracy for different presentation frequencies over time relative to stimulus onset, with shaded areas showing standard error across subjects (N=20). Thresholded Bayes factors (BF) and p-values for above-chance decoding or non-zero differences are displayed below the plot for each frequency.

88 To investigate to what extent the visual features preserved in the texform versions of the objects drive categorical  
89 distinctions in activation patterns, we trained classifiers on decoding animacy from the stimuli, using an exemplar-  
90 by-sequence cross-validation approach to avoid overfitting to individual images (Carlson et al., 2013; Grootswagers  
91 et al., 2019). For texforms, above chance decoding of (featural) animacy was observed between 300ms and 400ms  
92 after stimulus onset (Figure 3A) for the 5Hz presentation frequency but was not evident for the faster presentation  
93 rates. Animacy decoding in intact object images, in contrast, was above chance for 5Hz, 20Hz and 30Hz (Figure  
94 3B). Onset of animacy decoding was approximately 150ms for the 5Hz and 20Hz conditions, and at 220ms for  
95 the 30Hz frequency. The differences between texform and intact object animacy decoding accuracies (Figure 3C)  
96 highlight the substantial difference at 5Hz, which an exploratory searchlight suggested to be mainly located across  
97 occipito-temporal areas (Figure 3D). Cross-decoding (Figure 3E&F) showed that part of the animacy pattern  
98 generalised between intact objects and texforms. This result shows that the shared visual features between  
99 texforms and intact objects contributes to, but do not wholly explain, the categorical representation of animacy in  
:00 the brain.

:01 In the final analysis, we asked if the categorical representation of real-world size emerges similarly for intact and  
:02 texform versions of objects. An exemplar-by-sequence cross-validation approach was used to decode real world  
:03 size (small versus large objects) for the texform and intact objects. At none of the presentation rates was (featural)  
:04 real-world size decodable from the texform stimuli (Figure 4A). Real world size of the intact object images was  
:05 decodable for 5Hz and 20Hz frequencies (Figure 4B). The differences between texform and intact object size  
:06 decoding accuracies are shown in Figure 4C. Cross-decoding showed evidence for no shared pattern of object size  
:07 between intact objects and texforms (Figure 4E&F). Combined, the animacy and size decoding results show a  
:08 fundamental difference in how conceptual categories emerge for intact objects and their scrambled counterparts.

### A texforms: animacy decoding

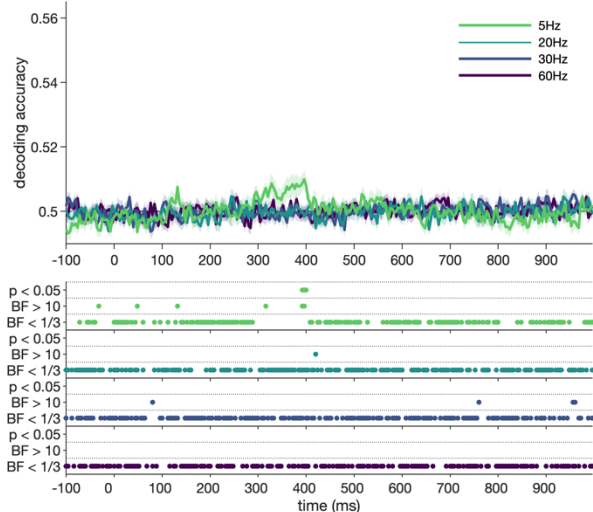

### B intact objects: animacy decoding

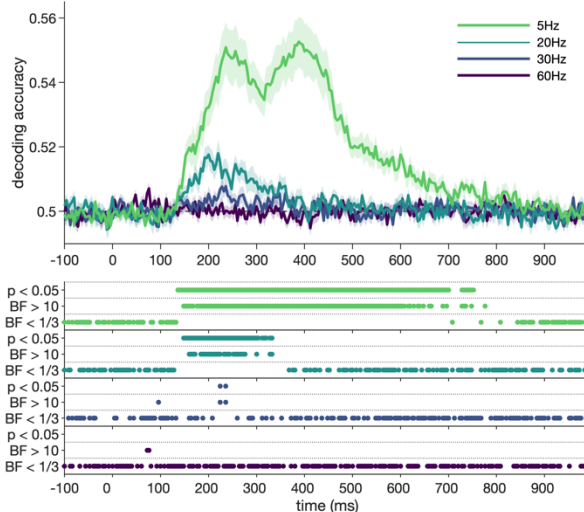

### C decoding difference (intact-texform)

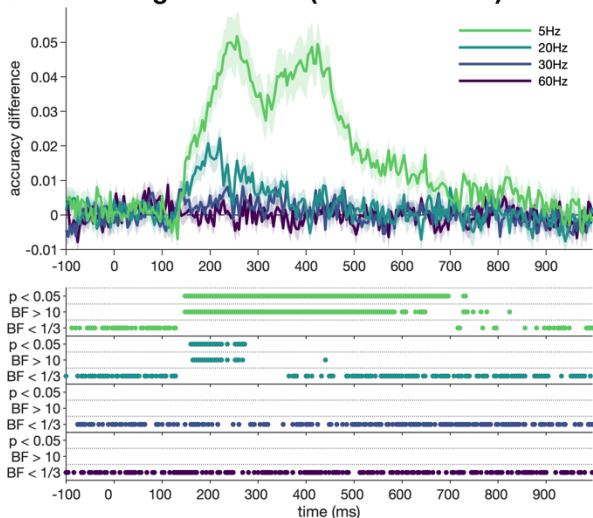

### D channel decoding differences at 5Hz

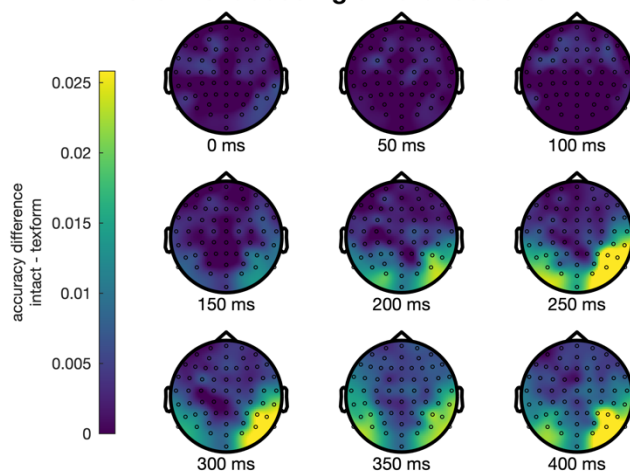

### E cross-decoding (test on texforms)

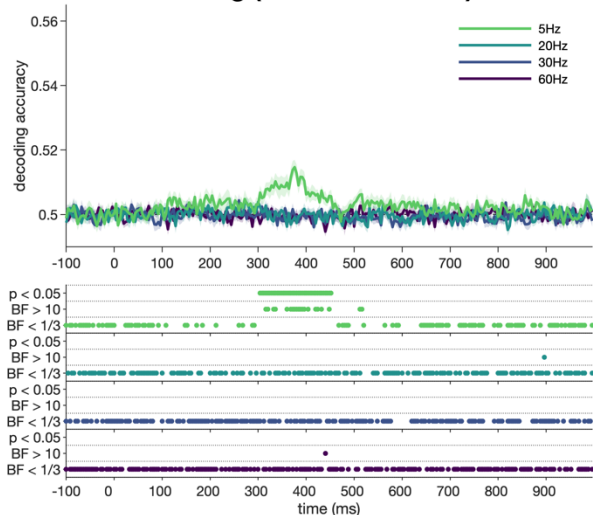

### F cross-decoding (test on intact objects)

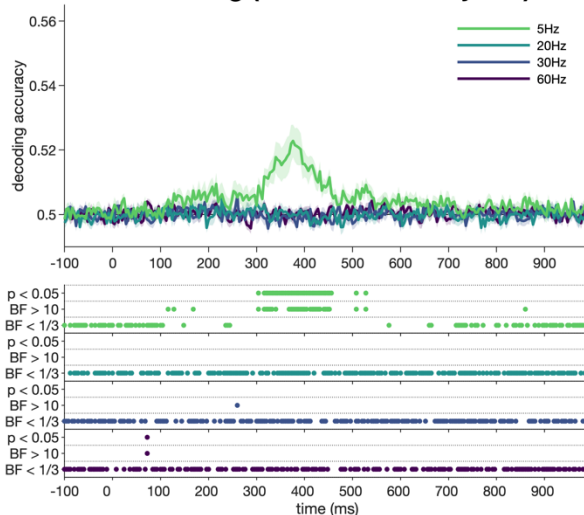

**Figure 3. Decoding animacy from texforms and intact objects.** **A.** Decoding the animacy of the texform images. **B.** Decoding the animacy of the intact objects. **C.** Difference between intact objects and texforms at each frequency. **D.** Channel searchlight maps at nine time points for the decoding differences at 5Hz. **E.** Decoding animacy from texforms, training the classifier on intact objects. **F.** Decoding animacy from intact objects, training on texforms. Different lines in each plot show decoding accuracy for different presentation frequencies over time relative to stimulus onset, with shaded areas showing standard error across subjects (N=20). Thresholded Bayes factors (BF) and p-values for above-chance decoding or non-zero differences are displayed below the plot for each frequency.

### A texforms: size decoding

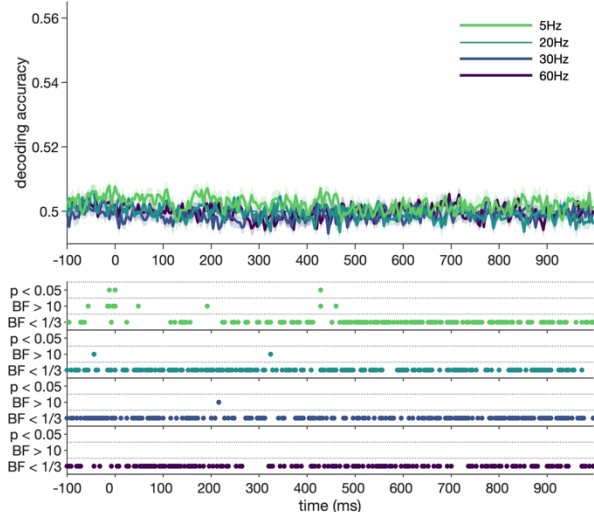

### B intact objects: size decoding

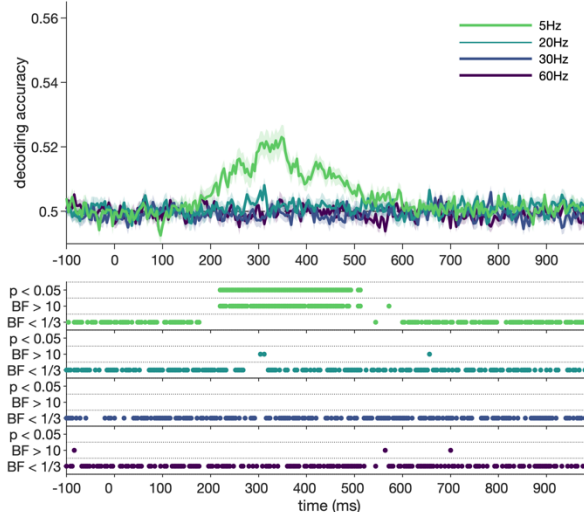

### C decoding difference (intact-texform)

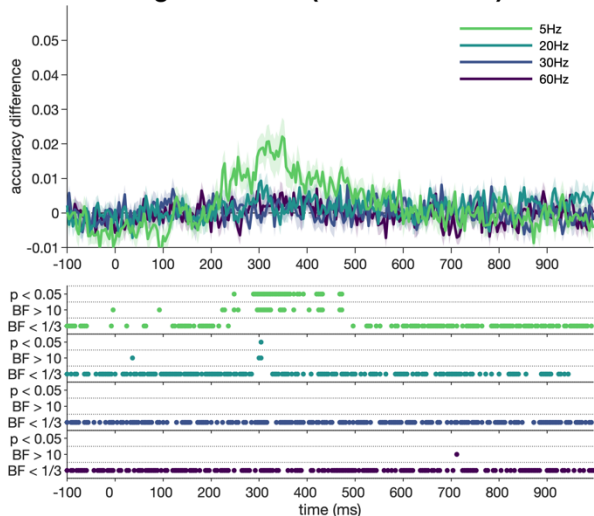

### D channel decoding differences at 5Hz

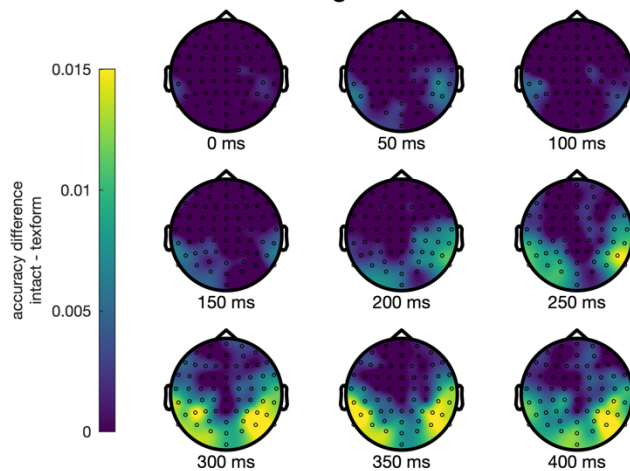

### E cross-decoding (test on texforms)

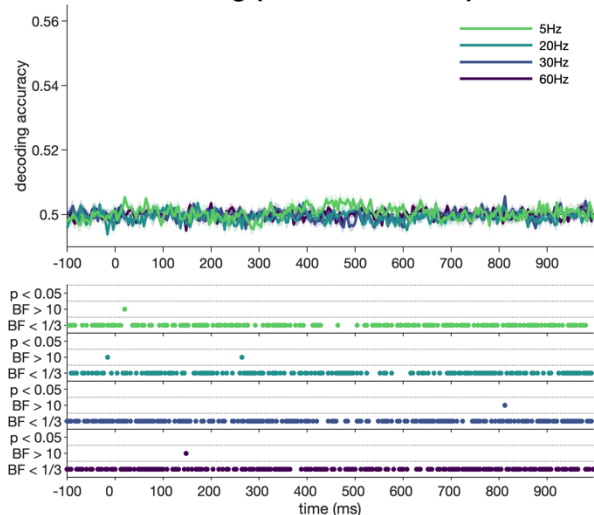

### F cross-decoding (test on intact objects)

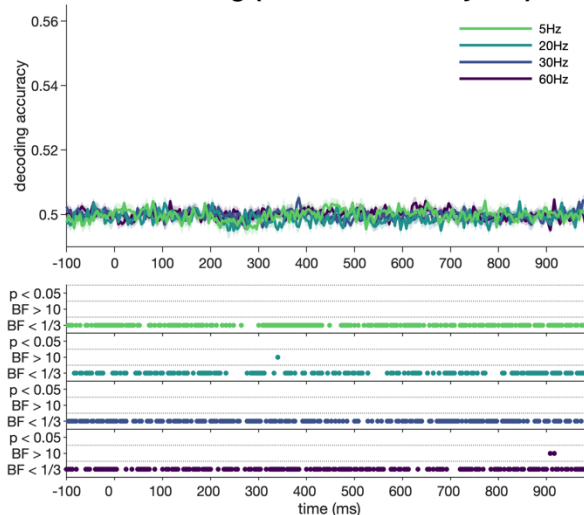

17 **Figure 4. Size was only decodable from intact objects.** **A.** Decoding the real-world size of the texform images.  
 18 **B.** Decoding the real-world size of the intact objects. **C.** Difference between intact objects and texforms at each  
 19 frequency. **D.** Channel searchlight maps at nine time points for the decoding differences at 5Hz. **E.** Decoding size  
 20 from texforms, training the classifier on intact objects. **F.** Decoding size from intact objects, training on texforms.  
 21 Different lines in each plot show decoding accuracy for different presentation frequencies over time relative to  
 22 stimulus onset, with shaded areas showing standard error across subjects (N=20). Thresholded Bayes factors (BF)  
 23 and p-values for above-chance decoding or non-zero differences are displayed below the plot for each frequency.

## !24 Discussion

!25 In this study, we assessed the contribution of mid-level features to high level categorical object representations  
!26 using a combination of fast periodic visual processing streams and multivariate EEG decoding. We used images  
!27 of intact and texform versions of objects from a previously published study (Long et al., 2018) and found that  
!28 their neural representations were similarly distinct at the image level. In contrast, the decoding accuracies of the  
!29 original categorical distinctions of animacy and real-world size varied markedly across the texform and intact  
!30 versions of the objects. The patterns of neural activity evoked by animate and inanimate intact objects were  
!31 decodable during a larger time period than their texform versions, suggesting the temporal dynamics of animacy-  
!32 like patterns varied between intact and texform versions despite their shared mid-level visual features. In addition,  
!33 the animacy of intact objects was decodable at 5Hz, 20Hz and 30Hz, but texforms were only decodable at 5Hz.  
!34 Higher level categorical brain regions exhibit larger responses to slower presentation rates relative to faster rates  
!35 (McKeeff et al., 2007), and we previously found that slower object presentations reached higher, more abstract  
!36 levels of visual processing (Grootswagers et al., 2019; Robinson et al., 2019). Thus, the absence of animacy  
!37 decoding for texform objects at faster presentation rates indicates that higher level processing was required for the  
!38 animate/inanimate distinction in texform stimuli. Moreover, a clear double-peak structure was observed for  
!39 decoding the intact objects at 5Hz, but not for the texforms. This could reflect an additional conceptual processing  
!40 step that is unique to intact objects presented at a frequency that allows reaching conceptual processing stages. We  
!41 interpret these findings as evidence that shared visual features between texforms and intact objects contribute to,  
!42 but do not wholly explain, the categorical organisation of animacy in the brain.

!43 Our results corroborate fMRI results using the same stimuli showing that texforms and intact objects generated  
!44 similar categorical representations along the visual hierarchy but that the recognizable images generated stronger  
!45 category responses (Long et al., 2018). The current results further show a clear difference in the temporal dynamics  
!46 of animacy representations within the visual system for featural versus conceptual object representations. At faster  
!47 presentation rates, animacy decoding was observed in intact objects but not in texforms, indicating that intact  
!48 objects promote categorical representations with limited processing. It is important to note that the intact objects  
!49 were shown only in the second half of the experiment, which might have contributed to better animacy decoding  
!50 for intact objects. However, image-level results were similar between texforms and intact objects, which suggests

!51 that the experimental paradigm was not wholly responsible for the differences in categorical-level decoding.  
!52 Together, these results suggest that brain responses to intact objects contain additional animacy category  
!53 information over and above the statistical visual regularities present in the texforms.

!54 The texform scrambling process was used to render images unrecognisable at the individual image level, while  
!55 maintaining featural image statistics. Some low-level visual information may have been lost in the scrambling  
!56 process, such as shape and curvature information, which is a strong cue for animacy (Levin, Takarae, Miner, &  
!57 Keil, 2001; Schmidt, Hegele, & Fleming, 2017; Zachariou, Giacco, Ungerleider, & Yue, 2018). In MEG and EEG  
!58 decoding studies, classification can be strongly driven by differences in object shape (Proklova et al., 2019), and  
!59 silhouette similarity is often a strong predictor of the similarities between the earliest neural responses (Carlson et  
!60 al., 2013; Grootswagers et al., 2019; Teichmann, Grootswagers, Carlson, & Rich, 2018; Wardle, Kriegeskorte,  
!61 Grootswagers, Khaligh-Razavi, & Carlson, 2016). It is also important to note that while the texform images are  
!62 not recognisable at the individual level, they can still be categorised (e.g., for animacy) above chance (Long et al.,  
!63 2017). Human categorisation accuracies on these images was found to be predicted by the amount of curvilinear  
!64 and rectilinear information in the image (Zachariou et al., 2018). Yet, even if intermediate visual features are  
!65 sufficient to classify conceptual categories above-chance behaviourally, our results suggest that this is only possible  
!66 given sufficient processing time.

!67 These findings support the notion that large-scale categorical organisations in the visual system are to some extent  
!68 driven by mid-level visual features. However, if concepts were decodable using only brain responses to mid-level  
!69 feature, then this would predict above-chance decoding of concepts also at faster frequencies for the texforms.  
!70 This was not the case in our results. Instead, we only observed animacy decoding for the slowest (5Hz)  
!71 presentation frequency, which suggests that the conceptual animacy category only emerges from mid-level features  
!72 after deeper processing. Thus, it could be the case that mid-level feature coding in early visual areas does not allow  
!73 for concept decoding, but these features are “untangled” by higher visual areas into linearly separable categorical  
!74 organisations (DiCarlo & Cox, 2007). This would mean that visual features could indeed drive the organisation in  
!75 high level areas, but only given sufficient processing time for such untangling processes to complete. Furthermore,  
!76 the speed of processing or information transfer to these higher visual areas could be modulated by the amount of  
!77 evidence that supports the successful recognition of an object. For example, the intact objects have a well-defined

:78 outline that separates the object from the background, while the edges of the texforms are more blurred. This  
:79 potentially could disrupt segmentation processes which in turn delays the amount of time it takes for information  
:80 to reach higher level recognition stages. The results of this study therefore suggest a complex interplay between  
:81 early and late stages of processing that ultimately manifests in more abstract categorical representations.

:82 A limitation of the current study is that the animacy and size category boundaries of the stimulus set also define  
:83 four subcategories, for example, most small objects are tools, and most big animals are mammals. Therefore, the  
:84 results could be driven by these subcategories, rather than overall conceptual animacy and size organisations.  
:85 Future work could explore this possibility, using stimulus sets that in addition match the subcategories within  
:86 animacy and size categories. In addition, while it is important to disentangle perceptual features from conceptual  
:87 representations, the two are inherently intermingled. Categorical organisations, such as animacy, are strongly  
:88 represented partly because they share perceptual characteristics, which makes them easier to discriminate. Indeed,  
:89 inanimate stimuli that share perceptual features with animate items evoke brain responses that are similar to other  
:90 animate stimuli (Bracci et al., 2019). On the other hand, neural responses to animate stimuli that share  
:91 characteristics with inanimate objects (e.g., a starfish) are more confusable with inanimate stimuli (Grootswagers,  
:92 Ritchie, et al., 2017). Moreover, when stimuli are closely matched in shape, the activation patterns can become  
:93 indistinguishable (Proklova et al., 2016, 2019). Together, these examples could be taken to suggest that the  
:94 dichotomy of animacy should be revised to more closely reflect, for example, a continuous account of perceptual  
:95 and conceptual animal typicality (Connolly et al., 2012; Contini, Goddard, Grootswagers, Williams, & Carlson,  
:96 2019; Grootswagers, Ritchie, et al., 2017; Jordan, Greene, Beck, & Fei-Fei, 2016; Sha et al., 2015; Thorat, Proklova,  
:97 & Peelen, 2019).

:98 In conclusion, we found that animacy was decodable from texform versions of objects, but that animacy of intact  
:99 objects was more strongly decodable, and at faster presentation frequencies. Information contained in the texform  
:00 versions of the objects thus not fully account for the distinct patterns of neural responses evoked by conceptual  
:01 object categories. These findings suggest that complex interactions between lower and higher levels of visual  
:02 processing mediate the representations of category, which has important implications for disentangling perceptual  
:03 and conceptual representations in the human brain.

## i04 Acknowledgements

i05 This research was supported by an Australian Research Council Future Fellowship (FT120100816) and an  
i06 Australian Research Council Discovery project (DP160101300) awarded to T.A.C. The authors acknowledge the  
i07 University of Sydney HPC service for providing High Performance Computing resources. The authors declare no  
i08 competing financial interests.

## i09 References

- i10 Andrews, T. J., Watson, D. M., Rice, G. E., & Hartley, T. (2015). Low-level properties of natural images predict  
i11 topographic patterns of neural response in the ventral visual pathway. *Journal of Vision*, *15*(7), 3–3.  
i12 <https://doi.org/10.1167/15.7.3>
- i13 Bracci, S., & Op de Beeck, H. P. (2016). Dissociations and Associations between Shape and Category  
i14 Representations in the Two Visual Pathways. *Journal of Neuroscience*, *36*(2), 432–444.  
i15 <https://doi.org/10.1523/JNEUROSCI.2314-15.2016>
- i16 Bracci, S., Ritchie, J. B., & de Beeck, H. O. (2017). On the partnership between neural representations of object  
i17 categories and visual features in the ventral visual pathway. *Neuropsychologia*, *105*, 153–164.  
i18 <https://doi.org/10.1016/j.neuropsychologia.2017.06.010>
- i19 Bracci, S., Ritchie, J. B., Kalfas, I., & Op de Beeck, H. (2019). The ventral visual pathway represents animal  
i20 appearance over animacy, unlike human behavior and deep neural networks. *Journal of Neuroscience*, 1714–  
i21 1718. <https://doi.org/10.1523/JNEUROSCI.1714-18.2019>
- i22 Caramazza, A., & Mahon, B. Z. (2003). The organization of conceptual knowledge: The evidence from category-  
i23 specific semantic deficits. *Trends in Cognitive Sciences*, *7*(8), 354–361. [https://doi.org/10.1016/S1364-  
i24 6613\(03\)00159-1](https://doi.org/10.1016/S1364-6613(03)00159-1)
- i25 Caramazza, A., & Shelton, J. R. (1998). Domain-Specific Knowledge Systems in the Brain: The Animate-Inanimate  
i26 Distinction. *Journal of Cognitive Neuroscience*, *10*(1), 1–34. <https://doi.org/10.1162/089892998563752>



- i27 Carlson, T. A., Tovar, D. A., Alink, A., & Kriegeskorte, N. (2013). Representational dynamics of object vision:  
i28 The first 1000 ms. *Journal of Vision*, *13*(10), 1. <https://doi.org/10.1167/13.10.1>
- i29 Cichy, R. M., Pantazis, D., & Oliva, A. (2014). Resolving human object recognition in space and time. *Nature*  
i30 *Neuroscience*, *17*(3), 455–462. <https://doi.org/10.1038/nn.3635>
- i31 Coggan, D. D., Liu, W., Baker, D. H., & Andrews, T. J. (2016). Category-selective patterns of neural response in  
i32 the ventral visual pathway in the absence of categorical information. *NeuroImage*, *135*, 107–114.  
i33 <https://doi.org/10.1016/j.neuroimage.2016.04.060>
- i34 Collins, E., Robinson, A. K., & Behrmann, M. (2018). Distinct neural processes for the perception of familiar  
i35 versus unfamiliar faces along the visual hierarchy revealed by EEG. *NeuroImage*, *181*, 120–131.  
i36 <https://doi.org/10.1016/j.neuroimage.2018.06.080>
- i37 Connolly, A. C., Guntupalli, J. S., Gors, J., Hanke, M., Halchenko, Y. O., Wu, Y.-C., ... Haxby, J. V. (2012). The  
i38 Representation of Biological Classes in the Human Brain. *The Journal of Neuroscience*, *32*(8), 2608–2618.  
i39 <https://doi.org/10.1523/JNEUROSCI.5547-11.2012>
- i40 Contini, E. W., Goddard, E., Grootswagers, T., Williams, M., & Carlson, T. (2019). A humanness dimension to  
i41 visual object coding in the brain. *BioRxiv*, 648998. <https://doi.org/10.1101/648998>
- i42 Contini, E. W., Wardle, S. G., & Carlson, T. A. (2017). Decoding the time-course of object recognition in the  
i43 human brain: From visual features to categorical decisions. *Neuropsychologia*, *105*, 165–176.  
i44 <https://doi.org/10.1016/j.neuropsychologia.2017.02.013>
- i45 Delorme, A., & Makeig, S. (2004). EEGLAB: An open source toolbox for analysis of single-trial EEG dynamics  
i46 including independent component analysis. *Journal of Neuroscience Methods*, *134*(1), 9–21.  
i47 <https://doi.org/10.1016/j.jneumeth.2003.10.009>
- i48 DiCarlo, J. J., & Cox, D. D. (2007). Untangling invariant object recognition. *Trends in Cognitive Sciences*, *11*(8), 333–  
i49 341. <https://doi.org/10.1016/j.tics.2007.06.010>

- i50 Dienes, Z. (2011). Bayesian Versus Orthodox Statistics: Which Side Are You On? *Perspectives on Psychological Science*,  
i51 6(3), 274–290. <https://doi.org/10.1177/1745691611406920>
- i52 Dienes, Z. (2016). How Bayes factors change scientific practice. *Journal of Mathematical Psychology*, 72, 78–89.  
i53 <https://doi.org/10.1016/j.jmp.2015.10.003>
- i54 Downing, P. E., Jiang, Y., Shuman, M., & Kanwisher, N. (2001). A Cortical Area Selective for Visual Processing  
i55 of the Human Body. *Science*, 293(5539), 2470–2473. <https://doi.org/10.1126/science.1063414>
- i56 Grootswagers, T., Cichy, R. M., & Carlson, T. A. (2018). Finding decodable information that can be read out in  
i57 behaviour. *NeuroImage*, 179, 252–262. <https://doi.org/10.1016/j.neuroimage.2018.06.022>
- i58 Grootswagers, T., Ritchie, J. B., Wardle, S. G., Heathcote, A., & Carlson, T. A. (2017). Asymmetric Compression  
i59 of Representational Space for Object Animacy Categorization under Degraded Viewing Conditions. *Journal*  
i60 *of Cognitive Neuroscience*, 29(12), 1995–2010. [https://doi.org/10.1162/jocn\\_a\\_01177](https://doi.org/10.1162/jocn_a_01177)
- i61 Grootswagers, T., Robinson, A. K., & Carlson, T. A. (2019). The representational dynamics of visual objects in  
i62 rapid serial visual processing streams. *NeuroImage*, 188, 668–679.  
i63 <https://doi.org/10.1016/j.neuroimage.2018.12.046>
- i64 Grootswagers, T., Wardle, S. G., & Carlson, T. A. (2017). Decoding Dynamic Brain Patterns from Evoked  
i65 Responses: A Tutorial on Multivariate Pattern Analysis Applied to Time Series Neuroimaging Data. *Journal*  
i66 *of Cognitive Neuroscience*, 29(4), 677–697. [https://doi.org/10.1162/jocn\\_a\\_01068](https://doi.org/10.1162/jocn_a_01068)
- i67 Iordan, M. C., Greene, M. R., Beck, D. M., & Fei-Fei, L. (2016). Typicality sharpens category representations in  
i68 object-selective cortex. *NeuroImage*, 134, 170–179. <https://doi.org/10.1016/j.neuroimage.2016.04.012>
- i69 Jeffreys, H. (1961). *Theory of probability*. Oxford University Press.
- i70 Kaiser, D., Azzalini, D. C., & Peelen, M. V. (2016). Shape-independent object category responses revealed by  
i71 MEG and fMRI decoding. *Journal of Neurophysiology*, 115(4), 2246–2250.  
i72 <https://doi.org/10.1152/jn.01074.2015>

- 173 Kaneshiro, B., Guimaraes, M. P., Kim, H.-S., Norcia, A. M., & Suppes, P. (2015). A Representational Similarity  
174 Analysis of the Dynamics of Object Processing Using Single-Trial EEG Classification. *PLOS ONE*, *10*(8),  
175 e0135697. <https://doi.org/10.1371/journal.pone.0135697>
- 176 Kiani, R., Esteky, H., Mirpour, K., & Tanaka, K. (2007). Object Category Structure in Response Patterns of  
177 Neuronal Population in Monkey Inferior Temporal Cortex. *Journal of Neurophysiology*, *97*(6), 4296–4309.  
178 <https://doi.org/10.1152/jn.00024.2007>
- 179 Konkle, T., & Caramazza, A. (2013). Tripartite Organization of the Ventral Stream by Animacy and Object Size.  
180 *Journal of Neuroscience*, *33*(25), 10235–10242. <https://doi.org/10.1523/JNEUROSCI.0983-13.2013>
- 181 Kriegeskorte, N., Mur, M., Ruff, D. A., Kiani, R., Bodurka, J., Esteky, H., ... Bandettini, P. A. (2008). Matching  
182 Categorical Object Representations in Inferior Temporal Cortex of Man and Monkey. *Neuron*, *60*(6), 1126–  
183 1141. <https://doi.org/10.1016/j.neuron.2008.10.043>
- 184 Levin, D. T., Takarae, Y., Miner, A. G., & Keil, F. (2001). Efficient visual search by category: Specifying the  
185 features that mark the difference between artifacts and animals in preattentive vision. *Perception &*  
186 *Psychophysics*, *63*(4), 676–697.
- 187 Long, B., Störmer, V. S., & Alvarez, G. A. (2017). Mid-level perceptual features contain early cues to animacy.  
188 *Journal of Vision*, *17*(6), 20–20. <https://doi.org/10.1167/17.6.20>
- 189 Long, B., Yu, C.-P., & Konkle, T. (2018). Mid-level visual features underlie the high-level categorical organization  
190 of the ventral stream. *Proceedings of the National Academy of Sciences*, 201719616.  
191 <https://doi.org/10.1073/pnas.1719616115>
- 192 Mahon, B. Z., & Caramazza, A. (2011). What drives the organization of object knowledge in the brain? *Trends in*  
193 *Cognitive Sciences*, *15*(3), 97–103. <https://doi.org/10.1016/j.tics.2011.01.004>
- 194 Maris, E., & Oostenveld, R. (2007). Nonparametric statistical testing of EEG- and MEG-data. *Journal of Neuroscience*  
195 *Methods*, *164*(1), 177–190. <https://doi.org/10.1016/j.jneumeth.2007.03.024>

- 96 McKeeff, T. J., Remus, D. A., & Tong, F. (2007). Temporal Limitations in Object Processing Across the Human  
97 Ventral Visual Pathway. *Journal of Neurophysiology*, *98*(1), 382–393. <https://doi.org/10.1152/jn.00568.2006>
- 98 Mohsenzadeh, Y., Qin, S., Cichy, R. M., & Pantazis, D. (2018). Ultra-Rapid serial visual presentation reveals  
99 dynamics of feedforward and feedback processes in the ventral visual pathway. *ELife*, *7*, e36329.  
100 <https://doi.org/10.7554/eLife.36329>
- 101 Oostenveld, R., & Praamstra, P. (2001). The five percent electrode system for high-resolution EEG and ERP  
102 measurements. *Clinical Neurophysiology*, *112*(4), 713–719. [https://doi.org/10.1016/S1388-2457\(00\)00527-7](https://doi.org/10.1016/S1388-2457(00)00527-7)
- 103 Oosterhof, N. N., Connolly, A. C., & Haxby, J. V. (2016). CoSMoMVPA: Multi-Modal Multivariate Pattern  
104 Analysis of Neuroimaging Data in Matlab/GNU Octave. *Frontiers in Neuroinformatics*, *10*.  
105 <https://doi.org/10.3389/fninf.2016.00027>
- 106 op de Beeck, H. P., Haushofer, J., & Kanwisher, N. G. (2008). Interpreting fMRI data: Maps, modules and  
107 dimensions. *Nature Reviews Neuroscience*, *9*(2), 123–135. <https://doi.org/10.1038/nrn2314>
- 108 Proklova, D., Kaiser, D., & Peelen, M. V. (2016). Disentangling Representations of Object Shape and Object  
109 Category in Human Visual Cortex: The Animate–Inanimate Distinction. *Journal of Cognitive Neuroscience*, 1–  
110 13. [https://doi.org/10.1162/jocn\\_a\\_00924](https://doi.org/10.1162/jocn_a_00924)
- 111 Proklova, D., Kaiser, D., & Peelen, M. V. (2019). MEG sensor patterns reflect perceptual but not categorical  
112 similarity of animate and inanimate objects. *NeuroImage*.  
113 <https://doi.org/10.1016/j.neuroimage.2019.03.028>
- 114 Rice, G. E., Watson, D. M., Hartley, T., & Andrews, T. J. (2014). Low-Level Image Properties of Visual Objects  
115 Predict Patterns of Neural Response across Category-Selective Regions of the Ventral Visual Pathway. *The*  
116 *Journal of Neuroscience*, *34*(26), 8837–8844. <https://doi.org/10.1523/JNEUROSCI.5265-13.2014>
- 117 Ritchie, J. B., Bracci, S., & op de Beeck, H. P. (in press). Avoiding illusory effects in representational similarity  
118 analysis: What (not) to do with the diagonal. *NeuroImage*.  
119 <https://doi.org/10.1016/j.neuroimage.2016.12.079>

- 120 Ritchie, J. B., Tovar, D. A., & Carlson, T. A. (2015). Emerging Object Representations in the Visual System Predict  
121 Reaction Times for Categorization. *PLoS Comput Biol*, 11(6), e1004316.  
122 <https://doi.org/10.1371/journal.pcbi.1004316>
- 123 Robinson, A. K., Grootswagers, T., & Carlson, T. A. (2019). The influence of image masking on object  
124 representations during rapid serial visual presentation. *NeuroImage*, 197, 224–231.  
125 <https://doi.org/10.1016/j.neuroimage.2019.04.050>
- 126 Rouder, J. N., Speckman, P. L., Sun, D., Morey, R. D., & Iverson, G. (2009). Bayesian t tests for accepting and  
127 rejecting the null hypothesis. *Psychonomic Bulletin & Review*, 16(2), 225–237.
- 128 Schmidt, F., Hegele, M., & Fleming, R. W. (2017). Perceiving animacy from shape. *Journal of Vision*, 17(11), 10–10.  
129 <https://doi.org/10.1167/17.11.10>
- 130 Sha, L., Haxby, J. V., Abdi, H., Guntupalli, J. S., Oosterhof, N. N., Halchenko, Y. O., & Connolly, A. C. (2015).  
131 The Animacy Continuum in the Human Ventral Vision Pathway. *Journal of Cognitive Neuroscience*, 27(4), 665–  
132 678. [https://doi.org/10.1162/jocn\\_a\\_00733](https://doi.org/10.1162/jocn_a_00733)
- 133 Smith, S. M., & Nichols, T. E. (2009). Threshold-free cluster enhancement: Addressing problems of smoothing,  
134 threshold dependence and localisation in cluster inference. *NeuroImage*, 44(1), 83–98.  
135 <https://doi.org/10.1016/j.neuroimage.2008.03.061>
- 136 Spelke, E. S., Phillips, A., & Woodward, A. L. (1995). Infants' knowledge of object motion and human action. In  
137 D. Sperber, D. Premack, & A. J. Premack (Eds.), *Causal cognition: A multidisciplinary debate* (pp. 44–78). New  
138 York, NY, US: Clarendon Press/Oxford University Press.
- 139 Teichmann, L., Grootswagers, T., Carlson, T., & Rich, A. N. (2018). Decoding Digits and Dice with  
140 Magnetoencephalography: Evidence for a Shared Representation of Magnitude. *Journal of Cognitive*  
141 *Neuroscience*, 30(7), 999–1010. [https://doi.org/10.1162/jocn\\_a\\_01257](https://doi.org/10.1162/jocn_a_01257)
- 142 Thorat, S., Proklova, D., & Peelen, M. V. (2019). *The nature of the animacy organization in human ventral temporal cortex*.  
143 Retrieved from <https://arxiv.org/abs/1904.02866v1>

- 144 Wagenmakers, E.-J. (2007). A practical solution to the pervasive problems of p values. *Psychonomic Bulletin & Review*,  
145 14(5), 779–804. <https://doi.org/10.3758/BF03194105>
- 146 Wardle, S. G., Kriegeskorte, N., Grootswagers, T., Khaligh-Razavi, S.-M., & Carlson, T. A. (2016). Perceptual  
147 similarity of visual patterns predicts dynamic neural activation patterns measured with MEG. *NeuroImage*,  
148 132, 59–70. <https://doi.org/10.1016/j.neuroimage.2016.02.019>
- 149 Watson, D. M., Young, A. W., & Andrews, T. J. (2016). Spatial properties of objects predict patterns of neural  
150 response in the ventral visual pathway. *NeuroImage*, 126, 173–183.  
151 <https://doi.org/10.1016/j.neuroimage.2015.11.043>
- 152 Wetzels, R., Matzke, D., Lee, M. D., Rouder, J. N., Iverson, G. J., & Wagenmakers, E.-J. (2011). Statistical Evidence  
153 in Experimental Psychology: An Empirical Comparison Using 855 t Tests. *Perspectives on Psychological Science*,  
154 6(3), 291–298. <https://doi.org/10.1177/1745691611406923>
- 155 Wetzels, R., & Wagenmakers, E.-J. (2012). A default Bayesian hypothesis test for correlations and partial  
156 correlations. *Psychonomic Bulletin & Review*, 19(6), 1057–1064. <https://doi.org/10.3758/s13423-012-0295-x>
- 157 Zachariou, V., Giacco, A. C. D., Ungerleider, L. G., & Yue, X. (2018). Bottom-up processing of curvilinear visual  
158 features is sufficient for animate/inanimate object categorization. *Journal of Vision*, 18(12), 3–3.  
159 <https://doi.org/10.1167/18.12.3>
- 160 Zellner, A., & Siow, A. (1980). Posterior odds ratios for selected regression hypotheses. In J. M. Bernardo, M. H.  
161 DeGroot, D. V. Lindley, & A. F. M. Smith (Eds.), *Bayesian statistics: Proceedings of the First International Meeting*  
162 (pp. 585–603). Valencia: University of Valencia Press.

163
